# Supplementary material
Source: ML conference proceedings conference paper supplement (https://openaccess.thecvf.com/content/cvpr_2017/html/Logothetis_Semi-Calibrated_Near_Field_2017_CVPR_paper.html)
Supplement: Supplementary file 2 [file Logothetis_Semi-Calibrated_Near_Field_2017_CVPR_supplemental.zip]

Archive with 6 entries (5 files):
- 0311-supp/
- 0311-supp/0311-supp.pdf
- 0311-supp/hand.avi
- 0311-supp/buddha.avi
- 0311-supp/player.avi
- 0311-supp/statue_armadillo.avi
